# Supplementary material
Source: PubMed Central journal article supplement (PMC1586033)
Supplement: plntphys_pp.106.085969_1.pdf [file plntphys_pp.106.085969_1.pdf]

Supplemental Table S1. Description of SNP markers used in mapping

| SNP Mapping Name | SGCSNP Name | Chrom. | Approximate Location (cM) | SNP PCR Primer                                 | Extension Primer               | Polymorphism |     |
|------------------|-------------|--------|---------------------------|------------------------------------------------|--------------------------------|--------------|-----|
|                  |             |        |                           |                                                |                                | Ler          | Col |
| C5_101.7         | SGCSNP34    | 5      | 101.7                     | ATCATCGTCTCTCCCAAAGC<br>CCCCAAAACACTCTGCAAAT   | GGAATGTAGTTGAGATCAAATTGGAAGTGT | G            | T   |
| C5_104.6         |             | 5      | 104.6                     | CATACGGAGCCTGTCCATCT<br>TCGTGAATGGTTGTGTGCTT   | GTAATCGGTAGATGCTCTTTCCGCACTACT | T            | G   |
| C5_111           |             | 5      | 105                       | CCGACTCAAATCTCCCAAGA<br>GGACTAATGTGGCAAGCCAT   | CCGACTCAAATCTCCCAAGAGAGTGCAGCT | G            | T   |
| C5_120           | SGCSNP73    | 5      | 111.95                    | CGGTCTCAAACCACGATCTT<br>GAGAAAAGCTGACCACCGAG   | GAGAAGGTACATGACGGATATGATCACTTA | C            | T   |
| C4_33            |             | 4      | 33                        | CATCCTCAGCTTTTGGCTTC<br>TGATTCCAAGATCCCAATGT   | TGCAACATAACAATAGATTAGGTAGTCCGA | A            | G   |
| C4_34.6          |             | 4      | 34.6                      | GAAAGCAATAACCACCCTTTG<br>CAGACCTTCCTGCACATTCA  | TATGTAGATTTTCTATATCTTACCAGTACA | G            | A   |
| C4_36            |             | 4      | 36                        | ATTGTGGTCACTGCTGGTCA<br>CACATGAGAGATCTTTGGTGGA | GATGAGTATATTTTTCCCAAAAATTATATG | T            | C   |
| C4_37            | SGCSNP12008 | 4      | 37                        | TGTTTCAGTTTTGGTTCCCA<br>TTGATTTGGTTCCAGTTCC    | GAATTTATAAAAACTTGACAAAACTCTAA  | T            | C   |
| C4_42            |             | 4      | 42                        | CATGGCGCTATATCAGGGTT<br>TGCTTGTTGCTCTTCTTCGA   | ATGGATGCCACTTTTACTTTTCCGAAGACC | C            | T   |
