# Supplementary material
Source: PubMed Central journal article supplement (PMC1586033)

**Supplemental Figure S1.** Map-based cloning of DAS534-resistance mutations. The horizontal line represents a segment of the mapped chromosome, the vertical lines indicate the position of the markers used in fine-mapping experiments. A, mapping of *afb5-1*, B, mapping of *sgt1b-4*.

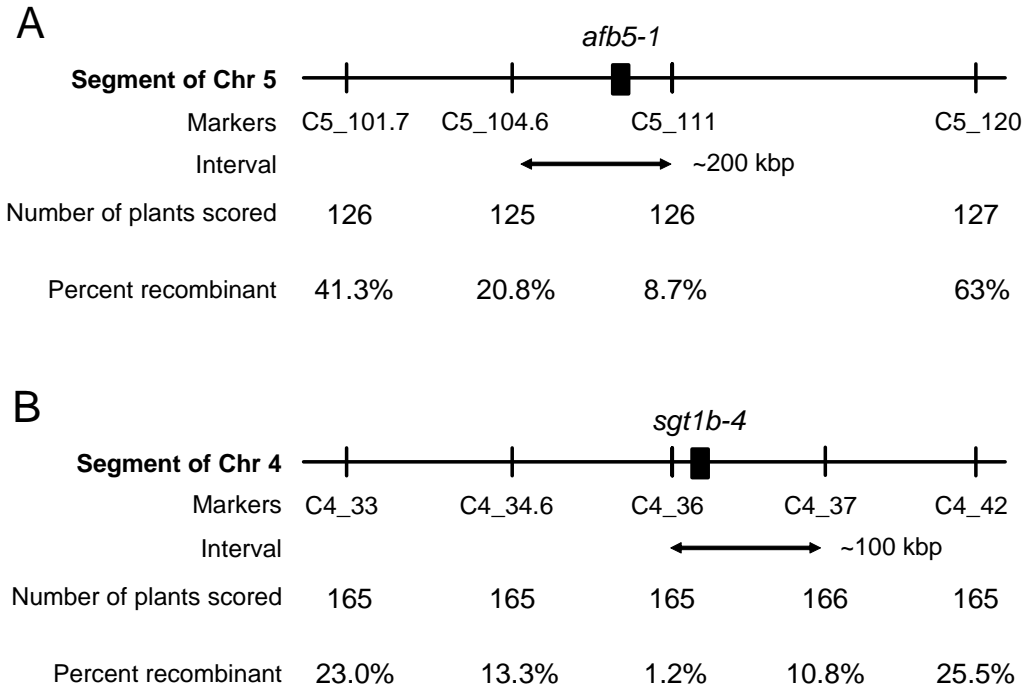

Supplement: plntphys_pp.106.085969_2.pdf [file plntphys_pp.106.085969_2.pdf]
